# Supplementary material for: Comprehensive Analysis of Calcium Sensor Families, CBL and CIPK, in Aeluropus littoralis and Their Expression Profile in Response to Salinity
Source: MDPI journal article supplement (doi:10.3390/genes14030753), 2023-03-20
Supplement: s1 [file s1]

**Table S1.** List of primers of *AlCBL* genes used in qPCR analysis

| Gene symbol     | Sequence (5'->3')             | Primer length | Tm   | GC%  | Leaf PCR eff. |       | Amplicon |      |
|-----------------|-------------------------------|---------------|------|------|---------------|-------|----------|------|
|                 |                               |               |      |      | Mean %        | SD    | length   | Tm   |
| <i>ALCBL2</i> * | F: CGGCATGATTAGCAAGGAAGAGT    | 23            | 67.0 | 47.8 | -             | -     | 78.7     | -    |
|                 | R: GCGTCAGGATGGAAGACAGATAA    | 23            | 66.2 | 47.8 |               |       |          |      |
| <i>AlCBL4.1</i> | F: CGAACGGTGACGGTAAGATAGA     | 22            | 65.7 | 50.0 | 94.1          | 0.016 | 139      | 79.8 |
|                 | R: GCTCCAGAGGCCAGAACAA        | 19            | 66.2 | 57.9 |               |       |          |      |
| <i>AlCBL4.2</i> | F: CAAAGACGGGCTGATTACAC       | 19            | 63.0 | 52.6 | 92.1          | 0.016 | 163      | 81.4 |
|                 | R: AGGGTGGAAGATGTTGAGG        | 19            | 62.9 | 52.6 |               |       |          |      |
| <i>AlCBL4.3</i> | F: TTATTGAACGGCATGAGCTAAAGG   | 24            | 65.6 | 41.7 | 92.9          | 0.013 | 155      | 78.3 |
|                 | R: ATTCCAATCCTCTTGATCTATCTTCC | 26            | 65.6 | 42.3 |               |       |          |      |
| <i>AlCBL4.4</i> | F: TCTAAGAGGGACAGGCTACATC     | 22            | 64.7 | 50.0 | 93.7          | 0.019 | 78.8     | 96   |
|                 | R: ACAGTGCTATCCGACAGACA       | 20            | 64.9 | 50.0 |               |       |          |      |
| <i>AlCBL10</i>  | F: GATGGATCTCCCTCAACTT        | 19            | 60.0 | 47.4 | 92.4          | 0.029 | 69       | 81.3 |
|                 | R: CGTTCACCGAGAAGCAT          | 17            | 61.1 | 52.9 |               |       |          |      |
| <i>AlUBQ</i>    | F: CTTGGTCTGCTGTGTCTTG        | 20            | 63   | 50   | 89.8          | 0.025 | 200      | 80.5 |
|                 | R: CACGGTTCATTATCCATCAC       | 21            | 63   | 48   |               |       |          |      |
| <i>AlRPS3</i>   | F: ATTCACTGGCTGACCGGATG       | 20            | 63   | 55   | 93.6          | 0.022 | 107      | 78.5 |
|                 | R: GTGCCAAGGGTTGTGAGGTC       | 20            | 63   | 60   |               |       |          |      |
| <i>AlEF1-a</i>  | F: TGCTGTCGGTGTCATCAA         | 18            | 63   | 50   | 95.2          | 0.016 | 97       | 80   |
|                 | R: CTTCCATCAAACGCCTCATT       | 20            | 62.5 | 45   |               |       |          |      |

\* Not amplified

**Table S2.** List of primers of *AlCIPK* genes used in qPCR analysis

| Gene symbol       | Sequence (5'→3')             | Primer length | Tm   | GC%  | Leaf PCR eff. |       | mplicon |      |
|-------------------|------------------------------|---------------|------|------|---------------|-------|---------|------|
|                   |                              |               |      |      | Mean %        | SD    | length  | Tm   |
| <i>AlCIPK1.1</i>  | F: GCGTGTATCACAGAGA          | 17            | 59.6 | 52.9 |               |       |         |      |
|                   | R: AGGTGCGATGTAGTTAGG        | 18            | 59.9 | 50.0 | 94.5          | 0.030 | 156     | 81.3 |
| <i>AlCIPK1.2</i>  | F: TCTCTGAAGACGAAGGAAGGA     | 21            | 64.2 | 47.6 |               |       |         |      |
|                   | R: GGCTTGAGGTCCCTATGGTA      | 20            | 64.7 | 55.0 | 85.6          | 0.016 | 94      | 78.2 |
| <i>AlCIPK3.1</i>  | F: AGGGAACATTTCGCAAAGG       | 18            | 61.8 | 50.0 |               |       |         |      |
|                   | R: CATCTTGTGCTTGAGAACCT      | 20            | 62.0 | 45.0 | 93.6          | 0.023 | 101     | 80.5 |
| <i>AlCIPK4</i>    | F: TCCTGTGGCGTCATCCT         | 17            | 64.3 | 58.8 |               |       |         |      |
|                   | R: ATGTTGGCGTCGTCGAAG        | 18            | 64.6 | 55.6 | 93.7          | 0.024 | 62      | 80.5 |
| <i>AlCIPK5</i>    | F: CCGCCCGTCATCATCAC         | 17            | 64.4 | 64.7 |               |       |         |      |
|                   | R: CGTCTTCCTCCGACCATC        | 18            | 63.4 | 61.1 | 89.2          | 0.018 | 61      | 80.7 |
| <i>AlCIPK10.2</i> | F: ACACCGCCTCAACAATCATCAC    | 22            | 67.6 | 50.0 |               |       |         |      |
|                   | R: CAGCATTCACAGACATCACACCTT  | 24            | 67.6 | 45.8 | 90.0          | 0.024 | 138     | 77.8 |
| <i>AlCIPK10.6</i> | F: CAGAGTCAAGGAGGCAAGATG     | 21            | 64.6 | 52.4 |               |       |         |      |
|                   | R: GACAACACCACAAGACCAGATG    | 22            | 65.5 | 50.0 | 92.8          | 0.024 | 128     | 80.4 |
| <i>AlCIPK11</i>   | F: GTGTAGTGAGGAGGGAAG        | 18            | 59.8 | 55.6 |               |       |         |      |
|                   | R: CTTGAAGACGGCGACTT         | 17            | 61.0 | 52.9 | 85.5          | 0.015 | 86      | 82.8 |
| <i>AlCIPK12.1</i> | F: GCACAGCGTGATGGATG         | 17            | 62.6 | 58.8 |               |       |         |      |
|                   | R: AATGGTTGAGGAGCAGGAT       | 19            | 62.7 | 47.4 | 91.4          | 0.020 | 69      | 79.5 |
| <i>AlCIPK12.3</i> | F: GTCCTCTTCGTGCTCGT         | 17            | 62.8 | 58.8 |               |       |         |      |
|                   | R: CGTTGTCCAGGTGGTTAC        | 18            | 61.8 | 55.6 | 92.3          | 0.029 | 55      | 80.2 |
| <i>AlCIPK23</i>   | F: GTCACGCCTTCGCTGTA         | 17            | 63.5 | 58.8 |               |       |         |      |
|                   | R: GCTTCGTCTCGTCACCTT        | 18            | 63.5 | 55.6 | 93.6          | 0.023 | 148     | 81.9 |
| <i>AlCIPK26</i>   | F: CCAATTATGTTGCTCCTGAGGTGAT | 25            | 67.1 | 44.0 |               |       |         |      |
|                   | R: CTCCGCAAGACCAGACATCC      | 20            | 66.8 | 60.0 | 91.6          | 0.024 | 75      | 77.2 |
